# Supplementary material
Source: publisher figshare collection journal article supplement (https://tandf.figshare.com/ndownloader/files/16528757)
Supplement: Supplementary file 1 [file 16528757]

**Supplementary Information**

| **Species** | **GenBank Accession Number** | |
| --- | --- | --- |
| ***trnL-F*** | ***psbA-trnH*** |
| *O. hitkishorei* sp.nov | MK358465 | MK358464 |
| *O. malviae* | MG875324 | MG875321 |
| *O. parvifolium* | MG875323 | MG875322 |
| *O. gujaratense* | MH229476 | MH229474 |
| *O. pycnostichum* | ----- | KP643548 |
| *O. thermale var. thermale* | ----- | AB575343 |
| *O. gramineum* | AY138448 | ----- |
| *O. petiolatum* | AY138447 | AB575342 |
| *O. namegatae* | ----- | AB575340 |
| *O. reticulatum* | AY138446 | ----- |
| *O. vulgatum* | AY138450 | AB575344 |
| *O. richardsiae* | AY138451 | ----- |
| *O. pusillum* | AY138449 | ----- |
| *O. crotalophoroides* | AY138452 | ----- |
| *O. costatum* | AY138453 | ----- |
| *O. gomezianum* | AY138454 | ----- |
| *O. coriaceum* | JF950935 |  |
| *O. pendulum* | ----- | AB575341 |
| *O. falcatum* | ----- | KY099969 |
| *B. lunaria* | AY327841 | AB575330 |

**S1 Table. GenBank accession numbers of three chloroplast region (*trnL-F* and *psbA-trnH)* of *Ophioglossum* species used in this study.**
